# Supplementary material for: Design of doped cesium lead halide perovskite as a photo-catalytic CO2 reduction catalyst
Source: Royal Society of Chemistry journal article supplement (doi:10.1039/c9ta00550a), 2019-01-01
Supplement: c9ta00550a1.pdf [file c9ta00550a1.pdf]

Supporting Information

**Design of Doped Cesium Lead Halide Perovskite as Photo-Catalytic CO<sub>2</sub> Reduction Catalyst**

Chao Tang, Chongyang Chen, Weiwei Xu, and Lai Xu\*

Email: xulai15@suda.edu.cn

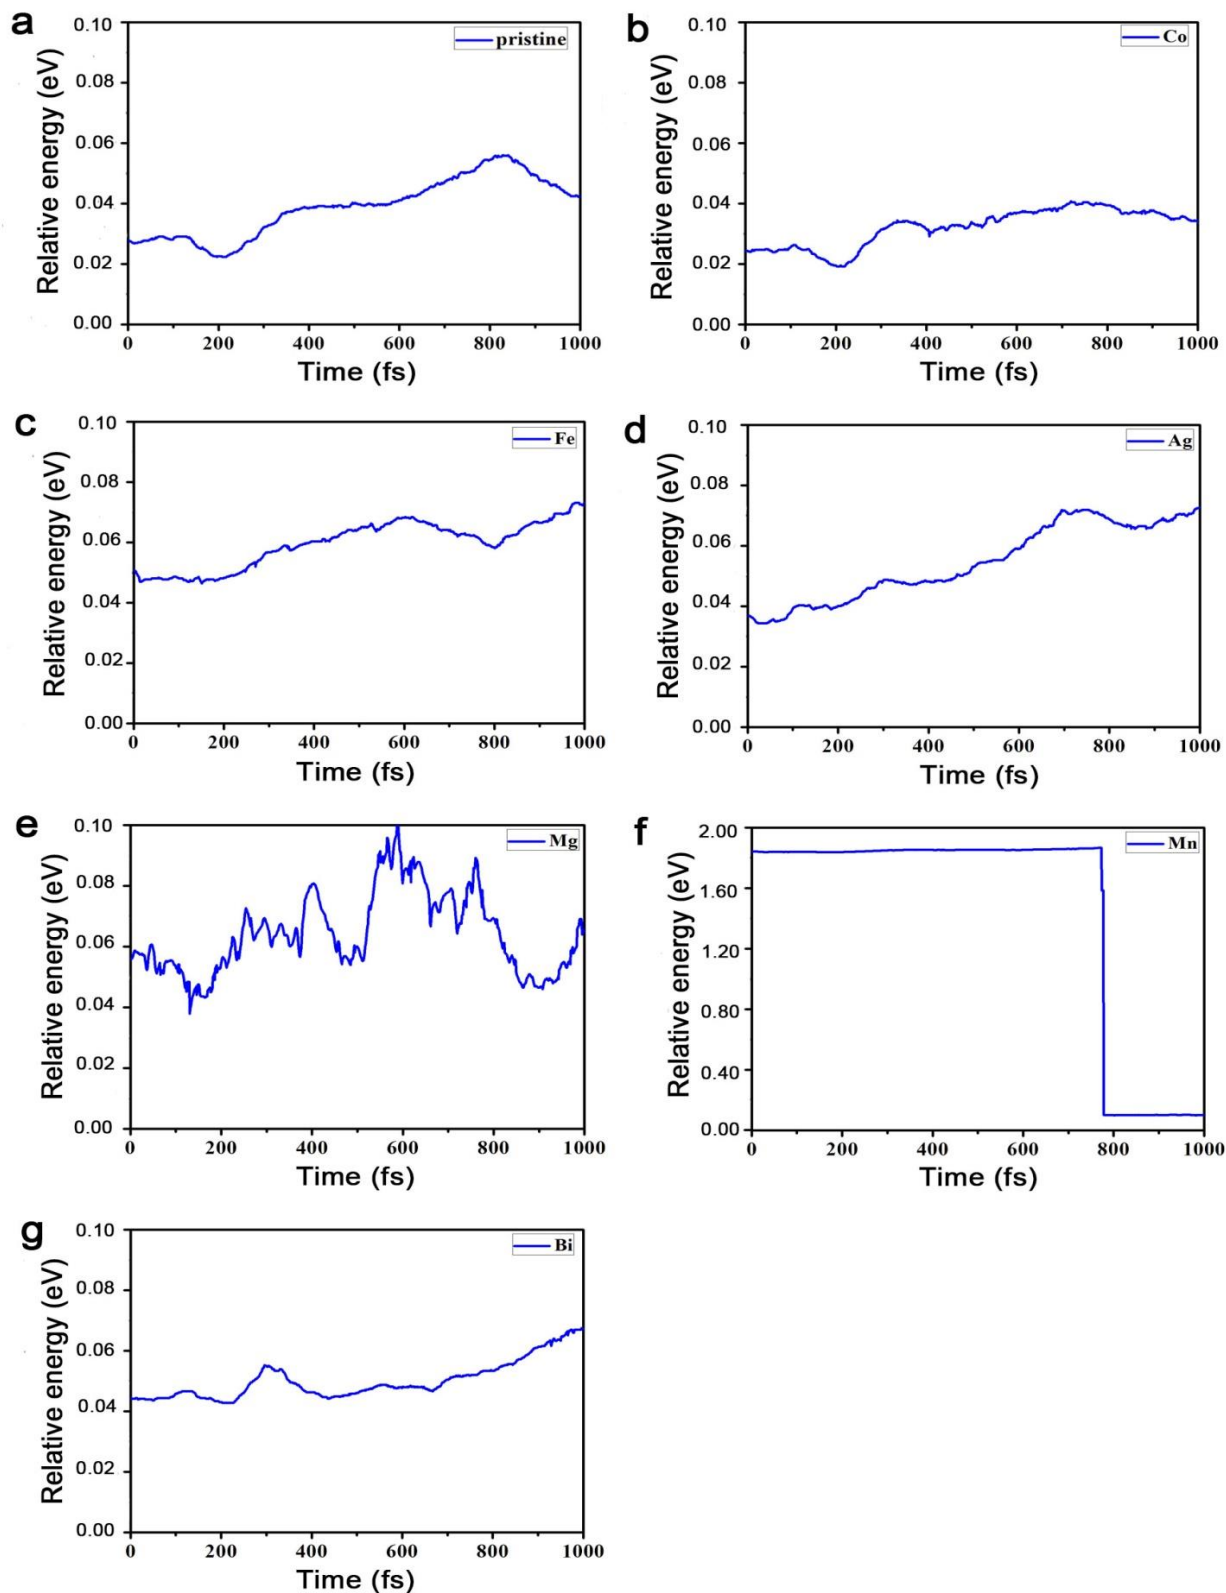

**Figure S1.** The ab initio molecular dynamics (AIMD) calculations of structures corresponding to Fig. 1 at 300 K (NVT) for 1 ps, (a) is pristine, (b-i) represents the doping of Co, Fe, Ag, Mg, Mn and Bi respectively.

**Table S1.** Lattice parameters of pristine and doped perovskite with different metals corresponding to Figure 1.

| <b>Name</b> | <b>a (Å)</b> | <b>b (Å)</b> | <b>c (Å)</b> | <b><math>\alpha</math> (°)</b> | <b><math>\beta</math> (°)</b> | <b><math>\gamma</math> (°)</b> |
|-------------|--------------|--------------|--------------|--------------------------------|-------------------------------|--------------------------------|
| pristine    | 11.92        | 11.92        | 11.92        | 84.54                          | 84.54                         | 89.48                          |
| Co-doped    | 12.06        | 11.95        | 11.93        | 86.41                          | 87.97                         | 91.55                          |
| Fe-doped    | 12.06        | 11.95        | 11.94        | 86.64                          | 87.16                         | 91.73                          |
| Ni-doped    | 12.09        | 11.99        | 11.93        | 86.48                          | 85.59                         | 92.09                          |
| Cu-doped    | 12.08        | 11.98        | 11.93        | 84.92                          | 84.73                         | 91.96                          |
| Ag-doped    | 11.92        | 11.92        | 11.93        | 87.17                          | 87.39                         | 89.96                          |
| Mg-doped    | 12.06        | 11.96        | 11.91        | 87.56                          | 86.41                         | 90.52                          |
| Mn-doped    | 12.07        | 11.96        | 11.94        | 87.08                          | 87.25                         | 89.37                          |
| Bi-doped    | 12.08        | 11.98        | 11.94        | 85.97                          | 86.29                         | 90.36                          |

**Table S2.** Summary of adsorption energies and possible configurations on Co-doped CsPbBr<sub>3</sub> explored by this study.

|                        |           |                     |                     |                     |                     |  |
|------------------------|-----------|---------------------|---------------------|---------------------|---------------------|--|
| <b>CO<sub>2</sub>*</b> | Top View  |                     |                     |                     |                     |  |
|                        | Side View | <br>Eads = -0.39 eV | <br>Eads = -0.27 eV |                     |                     |  |
| <b>C*O</b>             | Top View  |                     |                     |                     |                     |  |
|                        | Side View | <br>Eads = -2.89 eV | <br>Eads = -0.68 eV | <br>Eads = -1.91 eV |                     |  |
| <b>COOH*</b>           | Top View  |                     |                     |                     |                     |  |
|                        | Side View | <br>Eads = -2.13 eV | <br>Eads = -1.36 eV | <br>Eads = -1.36 eV | <br>Eads = -0.68 eV |  |

|                           |           |                              |                              |                              |                              |                              |
|---------------------------|-----------|------------------------------|------------------------------|------------------------------|------------------------------|------------------------------|
| <b>HCOO*</b>              | Top View  |                              |                              |                              |                              |                              |
|                           | Side View | <br>1.86Å<br>Eads = -2.37 eV | <br>1.89Å<br>Eads = -2.32 eV | <br>2.47Å<br>Eads = -2.31 eV |                              |                              |
| <b>HCO*OH</b>             | Top View  |                              |                              |                              |                              |                              |
|                           | Side View | <br>1.98Å<br>Eads = -1.23 eV | <br>2.09Å<br>Eads = -0.82 eV | <br>2.09Å<br>Eads = -0.89 eV | <br>3.07Å<br>Eads = -0.81 eV | <br>1.97Å<br>Eads = -1.16 eV |
| <b>H<sub>2</sub>CO*OH</b> | Top View  |                              |                              |                              |                              |                              |
|                           | Side View | <br>1.79Å<br>Eads = -2.24 eV | <br>2.45Å<br>Eads = -1.09 eV | <br>2.29Å<br>Eads = -1.63 eV |                              |                              |

|                         |           |                     |                     |                     |                     |  |
|-------------------------|-----------|---------------------|---------------------|---------------------|---------------------|--|
| $\text{HC}^*\text{O}$   | Top View  |                     |                     |                     |                     |  |
|                         | Side View | <br>Eads = -2.57 eV | <br>Eads = -1.19 eV | <br>Eads = -1.09 eV | <br>Eads = -0.60 eV |  |
| $\text{H}_2\text{CO}^*$ | Top View  |                     |                     |                     |                     |  |
|                         | Side View | <br>Eads = -1.29 eV | <br>Eads = -1.09 eV | <br>Eads = -0.81 eV | <br>Eads = -0.54 eV |  |
| $\text{H}_3\text{CO}^*$ | Top View  |                     |                     |                     |                     |  |
|                         | Side View | <br>Eads = -2.32 eV | <br>Eads = -1.89 eV |                     |                     |  |

|            |           |                                                                                                                 |                                                                                                                 |                                                                                                               |  |  |
|------------|-----------|-----------------------------------------------------------------------------------------------------------------|-----------------------------------------------------------------------------------------------------------------|---------------------------------------------------------------------------------------------------------------|--|--|
| $C^*H_2OH$ | Top View  | 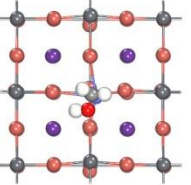                               |                                |                              |  |  |
|            | Side View | <br>1.95Å<br>Eads = -2.02 eV   | <br>2.09Å<br>Eads = -1.36 eV   | <br>2.26Å<br>Eads = -1.36 eV |  |  |
| $CH_3O^*H$ | Top View  |                                |                                |                                                                                                               |  |  |
|            | Side View | <br>1.99Å<br>Eads = -1.35 eV  | <br>2.67Å<br>Eads = -0.82 eV  |                                                                                                               |  |  |
| $C^*H_2$   | Top View  |                              |                              |                                                                                                               |  |  |
|            | Side View | <br>1.75Å<br>Eads = -3.73 eV | <br>1.99Å<br>Eads = -3.53 eV |                                                                                                               |  |  |

|            |           |                     |                     |  |  |  |
|------------|-----------|---------------------|---------------------|--|--|--|
| $C^*_3H_3$ | Top View  |                     |                     |  |  |  |
|            | Side View | <br>Eads = -1.86 eV | <br>Eads = -1.09 eV |  |  |  |
| $CH^*_4$   | Top View  |                     |                     |  |  |  |
|            | Side View | <br>Eads = -0.27 eV | <br>Eads = -0.26 eV |  |  |  |
| $HO^*_OH$  | Top View  |                     |                     |  |  |  |
|            | Side View | <br>Eads = -3.47 eV |                     |  |  |  |



**Table S3.** Summary of adsorption energies and possible configurations on Fe-doped CsPbBr<sub>3</sub> explored by this study.

|                        |           |                                                                                                                 |                                                                                                                 |                                                                                                                 |                                                                                                                   |  |
|------------------------|-----------|-----------------------------------------------------------------------------------------------------------------|-----------------------------------------------------------------------------------------------------------------|-----------------------------------------------------------------------------------------------------------------|-------------------------------------------------------------------------------------------------------------------|--|
| <b>CO<sub>2</sub>*</b> | Top View  | 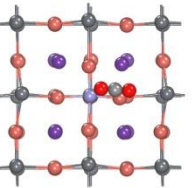                               |                                |                                                                                                                 |                                                                                                                   |  |
|                        | Side View | <br>3.52Å<br>Eads = -0.32 eV   | <br>2.13Å<br>Eads = -0.34 eV   |                                                                                                                 |                                                                                                                   |  |
| <b>C*O</b>             | Top View  |                               |                               |                               |                                                                                                                   |  |
|                        | Side View | <br>1.98Å<br>Eads = -0.56 eV | <br>1.78Å<br>Eads = -1.83 eV | <br>3.50Å<br>Eads = -0.31 eV |                                                                                                                   |  |
| <b>COOH*</b>           | Top View  |                              |                              |                              |                              |  |
|                        | Side View | <br>1.88Å<br>Eads = -1.40 eV | <br>1.88Å<br>Eads = -0.92 eV | <br>1.96Å<br>Eads = -1.14 eV | <br>2.59Å<br>Eads = -0.69 eV |  |

|                           |           |                                                            |                                                            |                                                            |                                                            |                                                            |
|---------------------------|-----------|------------------------------------------------------------|------------------------------------------------------------|------------------------------------------------------------|------------------------------------------------------------|------------------------------------------------------------|
| <b>HCOO*</b>              | Top View  |                                                            |                                                            |                                                            |                                                            |                                                            |
|                           | Side View | <br>$1.88\text{\AA}$<br>$E_{\text{ads}} = -1.83\text{ eV}$ | <br>$2.48\text{\AA}$<br>$E_{\text{ads}} = -0.92\text{ eV}$ |                                                            |                                                            |                                                            |
| <b>HCO*OH</b>             | Top View  |                                                            |                                                            |                                                            |                                                            |                                                            |
|                           | Side View | <br>$1.99\text{\AA}$<br>$E_{\text{ads}} = -0.94\text{ eV}$ | <br>$1.97\text{\AA}$<br>$E_{\text{ads}} = -0.81\text{ eV}$ | <br>$2.05\text{\AA}$<br>$E_{\text{ads}} = -0.69\text{ eV}$ | <br>$2.83\text{\AA}$<br>$E_{\text{ads}} = -0.23\text{ eV}$ | <br>$2.82\text{\AA}$<br>$E_{\text{ads}} = -0.56\text{ eV}$ |
| <b>H<sub>2</sub>CO*OH</b> | Top View  |                                                            |                                                            |                                                            |                                                            |                                                            |
|                           | Side View | <br>$1.77\text{\AA}$<br>$E_{\text{ads}} = -2.29\text{ eV}$ | <br>$2.26\text{\AA}$<br>$E_{\text{ads}} = -1.19\text{ eV}$ |                                                            |                                                            |                                                            |

|                         |           |                     |                     |                     |  |  |
|-------------------------|-----------|---------------------|---------------------|---------------------|--|--|
| $\text{HC}^*\text{O}$   | Top View  |                     |                     |                     |  |  |
|                         | Side View | <br>Eads = -1.83 eV | <br>Eads = -0.72 eV |                     |  |  |
| $\text{H}_2\text{CO}^*$ | Top View  |                     |                     |                     |  |  |
|                         | Side View | <br>Eads = -1.01 eV | <br>Eads = -0.42 eV | <br>Eads = -0.33 eV |  |  |
| $\text{H}_3\text{CO}^*$ | Top View  |                     |                     |                     |  |  |
|                         | Side View | <br>Eads = -2.44 eV | <br>Eads = -1.27 eV |                     |  |  |

|            |           |                     |                     |                     |  |  |
|------------|-----------|---------------------|---------------------|---------------------|--|--|
| $C^*H_2OH$ | Top View  |                     |                     |                     |  |  |
|            | Side View | <br>Eads = -1.64 eV | <br>Eads = -0.96 eV | <br>Eads = -1.09 eV |  |  |
| $CH_3O^*H$ | Top View  |                     |                     |                     |  |  |
|            | Side View | <br>Eads = -0.99 eV | <br>Eads = -0.79 eV |                     |  |  |
| $C^*H_2$   | Top View  |                     |                     |                     |  |  |
|            | Side View | <br>Eads = -3.85 eV | <br>Eads = -3.11 eV |                     |  |  |

|          |           |                     |                     |  |  |  |
|----------|-----------|---------------------|---------------------|--|--|--|
| $C_3^*$  | Top View  |                     |                     |  |  |  |
|          | Side View | <br>Eads = -1.62 eV | <br>Eads = -0.86 eV |  |  |  |
| $CH_4^*$ | Top View  |                     |                     |  |  |  |
|          | Side View | <br>Eads = -0.14 eV | <br>Eads = -0.13 eV |  |  |  |
| $HO_2^*$ | Top View  |                     |                     |  |  |  |
|          | Side View | <br>Eads = -2.62 eV |                     |  |  |  |

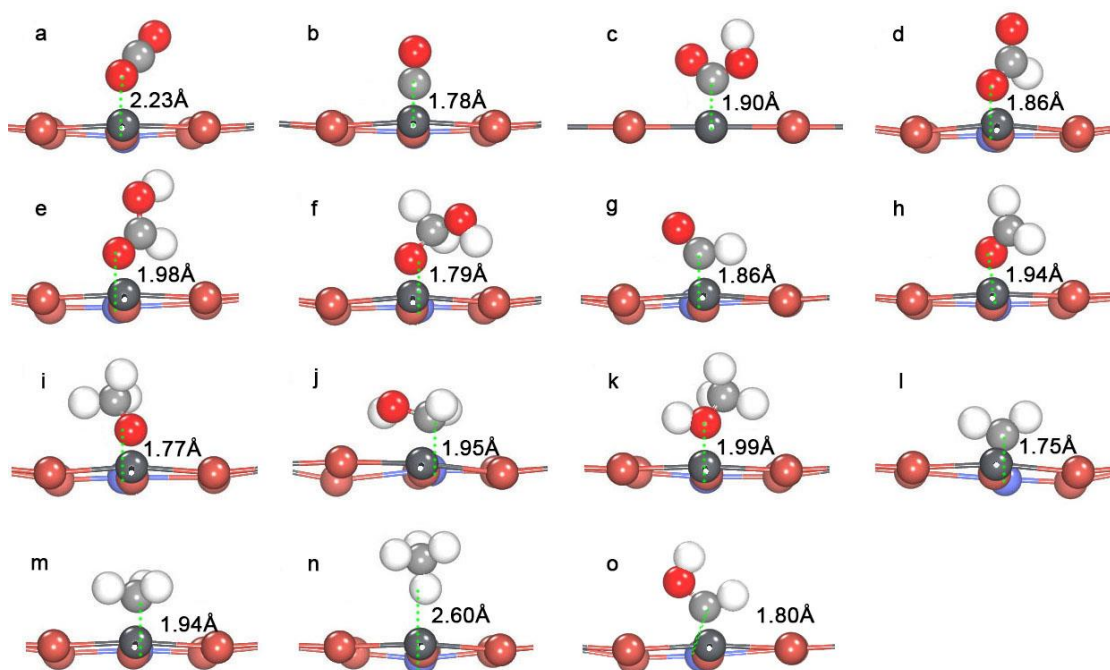

**Figure S2.** Optimized geometries of stable intermediates on the catalyst active sites. a-o:  $\text{CO}_2^*$ ,  $\text{C}^*\text{O}$ ,  $\text{C}^*\text{OOH}$ ,  $\text{HCOO}^*$ ,  $\text{HCO}^*\text{OH}$ ,  $\text{H}_2\text{CO}^*\text{OH}$ ,  $\text{HC}^*\text{O}$ ,  $\text{H}_2\text{CO}^*$ ,  $\text{H}_3\text{CO}^*$ ,  $\text{C}^*\text{H}_2\text{OH}$ ,  $\text{CH}_3\text{O}^*\text{H}$ ,  $\text{C}^*\text{H}_2$ ,  $\text{C}^*\text{H}_3$ ,  $\text{CH}_4^*$  and  $\text{HC}^*\text{OH}$  on the Co-doped  $\text{CsPbBr}_3$ .

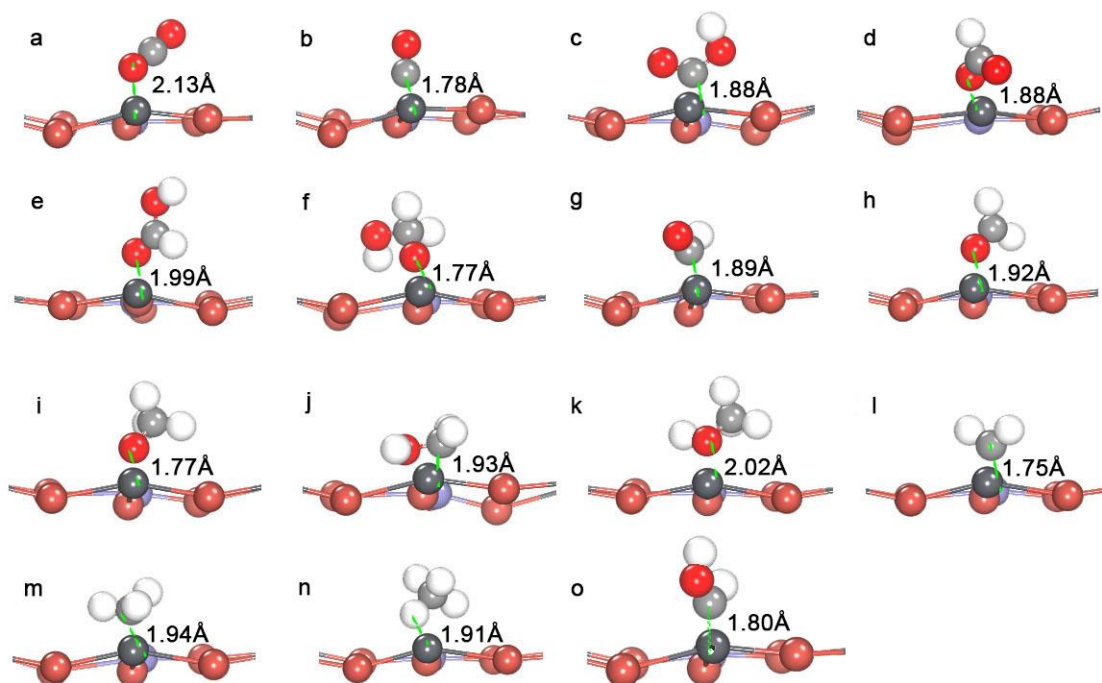

**Figure S3.** Optimized geometries of stable intermediates on the catalyst active sites. a-o:  $\text{CO}_2^*$ ,  $\text{C}^*\text{O}$ ,  $\text{C}^*\text{OOH}$ ,  $\text{HCOO}^*$ ,  $\text{HCO}^*\text{OH}$ ,  $\text{H}_2\text{CO}^*\text{OH}$ ,  $\text{HC}^*\text{O}$ ,  $\text{H}_2\text{CO}^*$ ,  $\text{H}_3\text{CO}^*$ ,  $\text{C}^*\text{H}_2\text{OH}$ ,  $\text{CH}_3\text{O}^*\text{H}$ ,  $\text{C}^*\text{H}_2$ ,  $\text{C}^*\text{H}_3$ ,  $\text{CH}_4^*$  and  $\text{HC}^*\text{OH}$  on the Fe-doped  $\text{CsPbBr}_3$ .

**Table S4.** Adsorption energies of the adsorbate molecules on (100) surfaces of pristine, Co-doped and Fe-doped CsPbBr<sub>3</sub> structures.

| No. | Intermediate structure | $E_{\text{ads}}^{\text{pristine}}$ (eV) | $E_{\text{ads}}^{\text{Co-doped}}$ (eV) | $E_{\text{ads}}^{\text{Fe-doped}}$ (eV) |
|-----|------------------------|-----------------------------------------|-----------------------------------------|-----------------------------------------|
| 1   | CO <sub>2</sub> *      | -0.25                                   | -0.39                                   | -0.34                                   |
| 2   | C*O                    | -1.11                                   | -2.89                                   | -1.83                                   |
| 3   | C*OOH                  | -0.22                                   | -2.13                                   | -1.40                                   |
| 4   | HCOO*                  | -1.11                                   | -2.37                                   | -1.83                                   |
| 5   | HC*O                   | -1.50                                   | -2.57                                   | -1.83                                   |
| 6   | HCO*OH                 | -0.23                                   | -1.23                                   | -0.94                                   |
| 7   | H <sub>2</sub> CO*OH   | -0.86                                   | -2.24                                   | -2.29                                   |
| 8   | H <sub>2</sub> CO*     | -0.21                                   | -1.29                                   | -1.01                                   |
| 9   | H <sub>3</sub> CO*     | -1.04                                   | -2.32                                   | -2.44                                   |
| 10  | C*H <sub>2</sub> OH    | -1.66                                   | -2.02                                   | -1.64                                   |
| 11  | CH <sub>3</sub> O*H    | -0.24                                   | -1.35                                   | -0.99                                   |
| 12  | C*H <sub>2</sub>       | -1.21                                   | -3.73                                   | -3.85                                   |
| 13  | C*H <sub>3</sub>       | -0.66                                   | -1.86                                   | -1.62                                   |
| 14  | CH <sub>4</sub> *      | -0.26                                   | -0.27                                   | -0.14                                   |
| 15  | HC*OH                  | -1.94                                   | -3.47                                   | -2.62                                   |

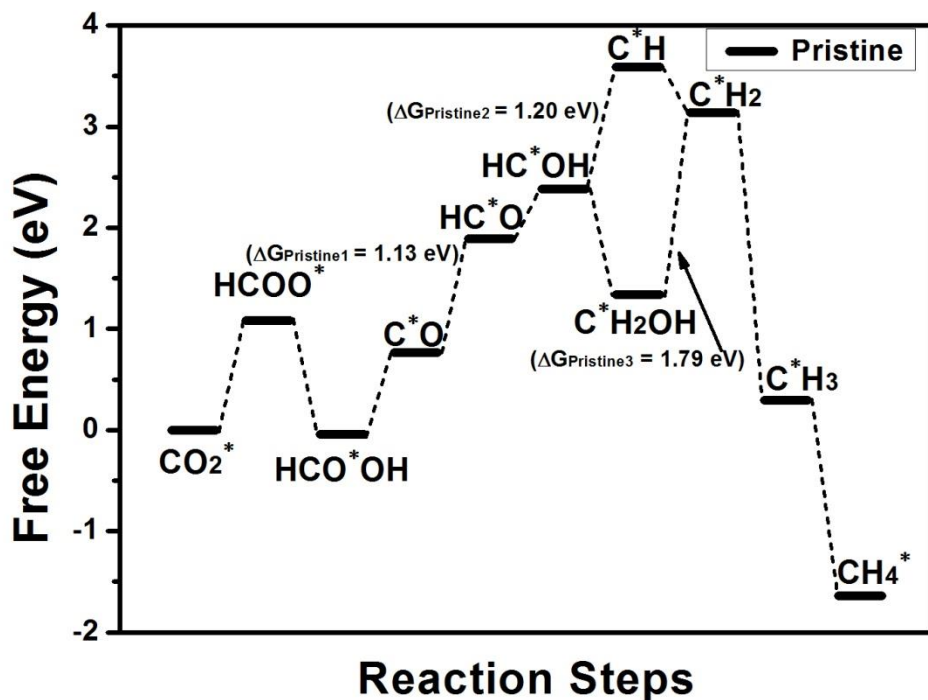

**Figure S4.** The free energy diagrams of possible paths of CO<sub>2</sub> reduction process on pristine CsPbBr<sub>3</sub>, and the important  $\Delta G$  of the reaction steps are listed.

**Table S5.** Hirshfeld charge of Pb, Co and Fe in the pristine, Co-doped and Fe-doped CsPbBr<sub>3</sub> respectively.

| <b>Steps</b>        | <b>Pb@pristine</b> | <b>Co@Co-doped</b> | <b>Fe@Fe-doped</b> |
|---------------------|--------------------|--------------------|--------------------|
| Free Standing       | 0.477              | 0.153              | 0.055              |
| CO <sub>2</sub> *   | 0.455              | 0.041              | 0.028              |
| HCOO*               | 0.468              | 0.104              | 0.068              |
| HCO*OH              | 0.455              | 0.058              | 0.044              |
| HC*OH               | 0.361              | 0.013              | 0.006              |
| C*H <sub>2</sub> OH | 0.447              | 0.034              | 0.024              |
| C*H <sub>2</sub>    | 0.353              | 0.048              | 0.047              |
| C*H <sub>3</sub>    | 0.400              | 0.075              | 0.077              |
| CH <sub>4</sub> *   | 0.461              | 0.044              | 0.063              |
| C*O                 | 0.442              | 0.003              | 0.001              |
| HC*O                | 0.383              | 0.034              | 0.013              |

**Table S6.** Hirshfeld charge of O1, O2 and C in the Co-doped CsPbBr<sub>3</sub>.

| <b>Steps</b>        | <b>O1</b> | <b>O2</b> | <b>C</b> |
|---------------------|-----------|-----------|----------|
| Free Standing       | -0.151    | -0.151    | 0.302    |
| CO <sub>2</sub> *   | -0.092    | -0.118    | 0.308    |
| HCOO*               | -0.192    | -0.272    | 0.114    |
| HCO*OH              | -0.138    | -0.113    | 0.185    |
| HC*OH               | -0.073    | NA        | 0.047    |
| C*H <sub>2</sub> OH | -0.106    | NA        | 0.051    |
| C*H <sub>2</sub>    | NA        | NA        | -0.075   |
| C*H <sub>3</sub>    | NA        | NA        | -0.191   |
| CH <sub>4</sub> *   | NA        | NA        | -0.165   |
| C*O                 | -0.071    | NA        | 0.123    |
| HC*O                | -0.17     | NA        | 0.04     |



**Table S7.** Hirshfeld charge of O1, O2 and C in the Fe-doped CsPbBr<sub>3</sub>.

| <b>Steps</b>        | <b>O1</b> | <b>O2</b> | <b>C</b> |
|---------------------|-----------|-----------|----------|
| Free Standing       | -0.151    | -0.151    | 0.302    |
| CO <sub>2</sub> *   | -0.082    | -0.109    | 0.317    |
| HCOO*               | -0.179    | -0.262    | 0.143    |
| HCO*OH              | -0.143    | -0.117    | 0.183    |
| HC*OH               | -0.101    | NA        | 0.012    |
| C*H <sub>2</sub> OH | -0.049    | NA        | 0.033    |
| C*H <sub>2</sub>    | NA        | NA        | -0.078   |
| C*H <sub>3</sub>    | NA        | NA        | -0.205   |
| CH <sub>4</sub> *   | NA        | NA        | -0.159   |
| C*O                 | -0.093    | NA        | 0.095    |
| HC*O                | -0.172    | NA        | 0.025    |
